# Supplementary material
Source: PubMed Central journal article supplement (PMC8544824)
Supplement: NIHMS1737120-supplement-Supplementary_Figures.pdf [file NIHMS1737120-supplement-Supplementary_Figures.pdf]

## **Supplemental Information**

### **Fasting drives the metabolic, molecular, and geroprotective effects of a calorie restricted diet in mice**

Heidi H. Pak, Spencer A. Haws, Cara L. Green, Mikaela Koller, Mitchell T. Lavarias, Nicole E. Richardson, Shany E. Yang, Sabrina N. Dumas, Michelle Sonsalla, Lindsey Bray, Michelle Johnson, Stephen Barnes, Victor Darley-Usmar, Jianhua Zhang, Chi-Liang Eric Yen, John M. Denu, and Dudley W. Lamming

# Supplementary Figure 1

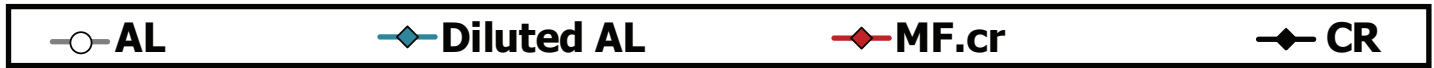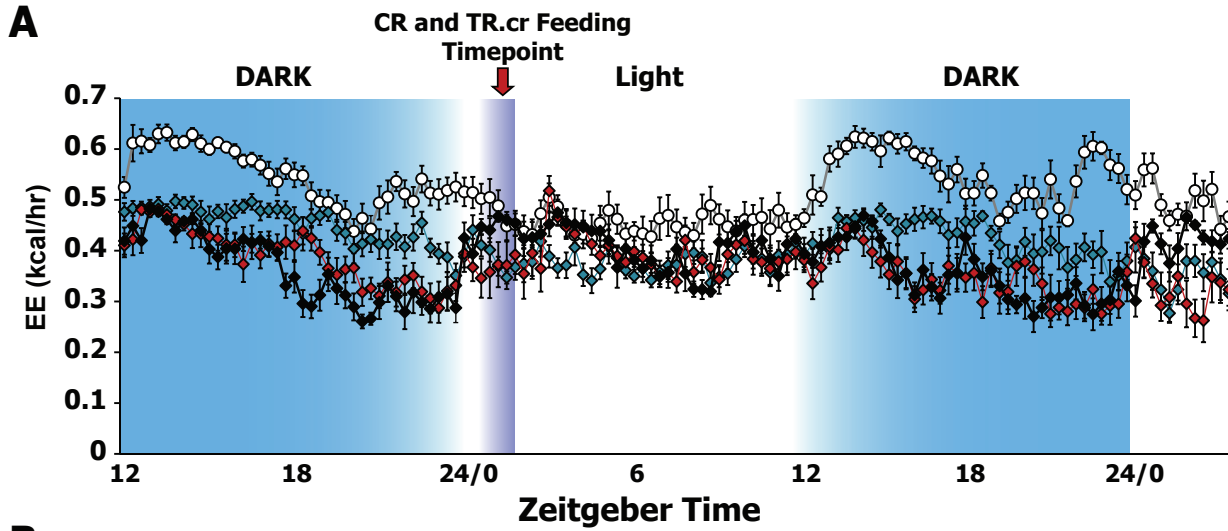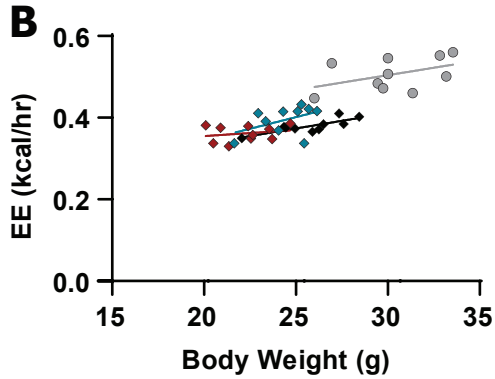

| Diet Comparison |            | Slope   |              | Elevation |              |
|-----------------|------------|---------|--------------|-----------|--------------|
| Diet 1          | Diet 2     | p-Value | Significance | p-Value   | Significance |
| AL              | Diluted AL | 0.6703  | No           | 0.0394    | Yes          |
| AL              | MF.cr      | 0.5922  | No           | 0.0061    | Yes          |
| AL              | CR         | 0.9724  | No           | <0.0001   | Yes          |
| Diluted AL      | CR         | 0.5913  | No           | 0.0315    | Yes          |
| Diluted AL      | MF.cr      | 0.3540  | No           | 0.2516    | No           |
| CR              | MF.cr      | 0.3458  | No           | 0.8312    | No           |

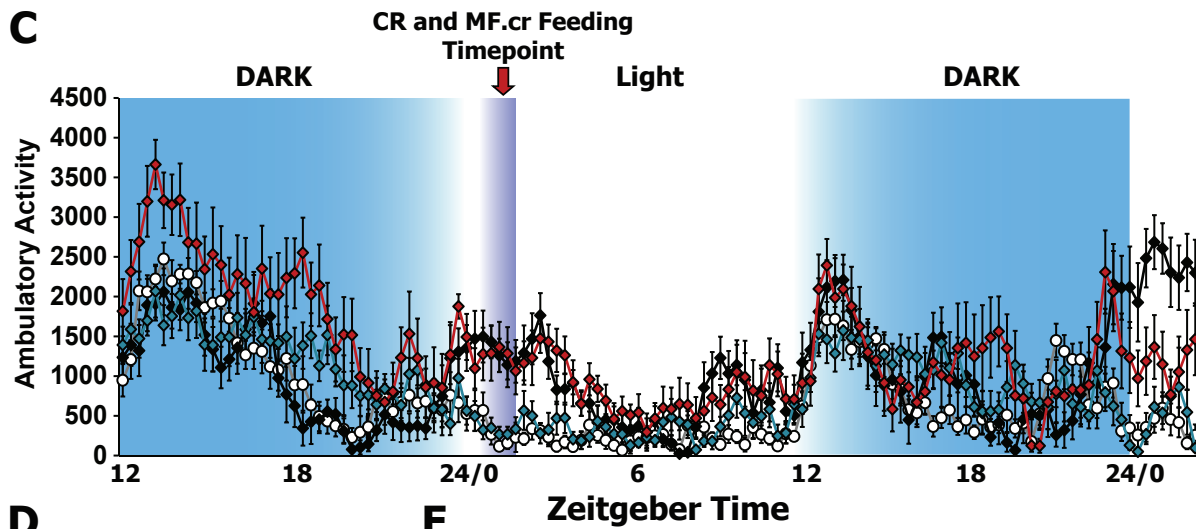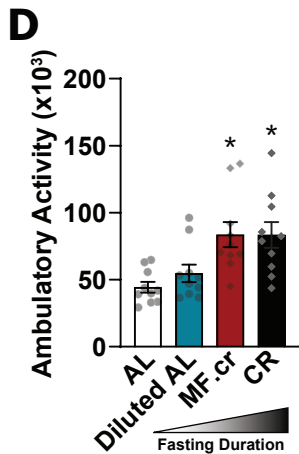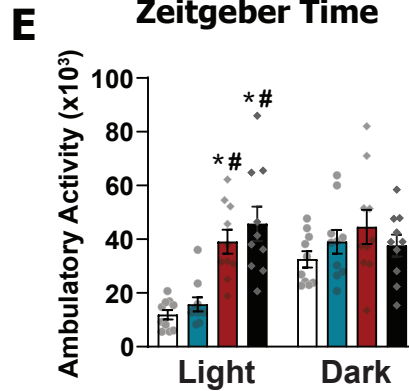

**Supplementary Figure 1. Additional metabolic chamber data for C57BL/6J male mice.** (A-E) Metabolic chamber analysis of mice fed the indicated diets. (A) Energy expenditure vs. time. (B) Energy expenditure as a function of total body mass was calculated for the 24-hour period following the indicated (arrow) refeeding time; slopes and intercepts were calculated using ANCOVA. (C) Ambulatory activity vs. time (D) Sum of ambulatory activity was calculated for the 24-hour period following the indicated (arrow) refeeding time. \* symbol represents a significant difference versus AL (MF.cr,  $p = 0.0046$ ; CR,  $p = 0.0060$ ); based on Kruskal-Wallis test post one-way ANOVA. (E) Sum of ambulatory activity during the light and dark cycle calculated for the 24-hour period following the indicated (arrow) refeeding time. \* symbol represents a significant difference versus AL (MF.cr,  $p = 0.0003$ ; CR,  $p < 0.0001$ ); # symbol represents a significant difference versus Diluted AL (MF.cr,  $p = 0.0021$ ; CR,  $p < 0.0001$ ) based on Tukey's test post one-way ANOVA. (A-E). All data are represented as mean  $\pm$  SEM.  $n = 10$  biologically independent mice per diet.

# Supplementary Figure 2

○ AL

◆ Diluted AL

◆ MF.cr

◆ CR

## A IP Glucose Tolerance

## B Insulin Tolerance

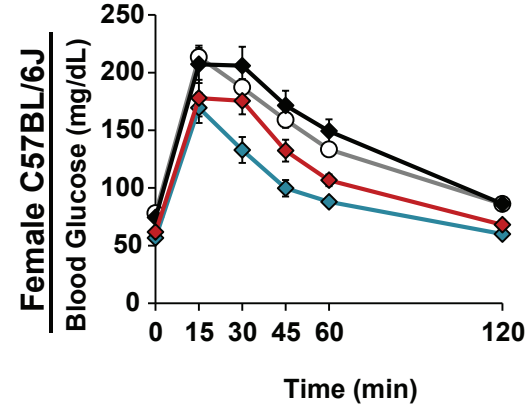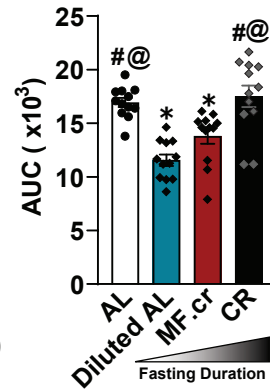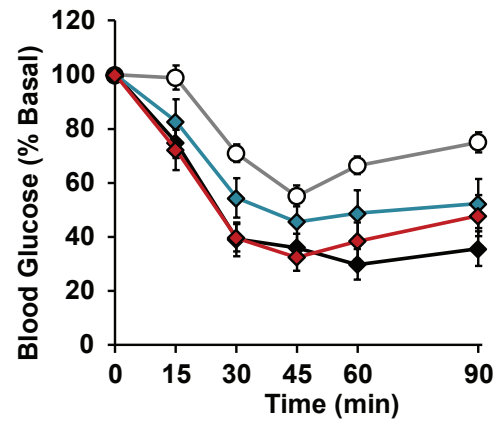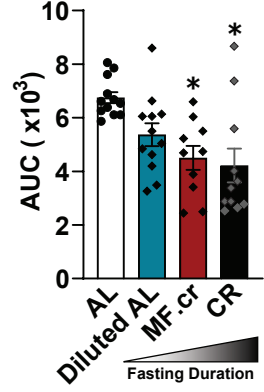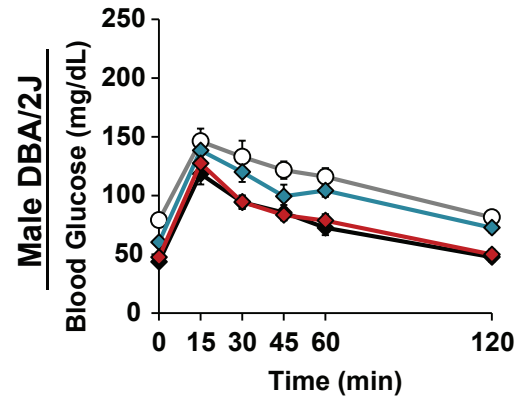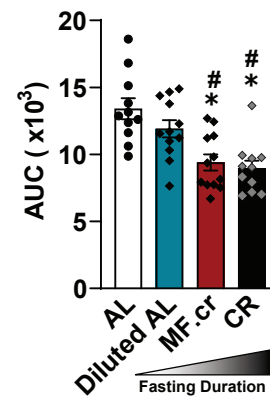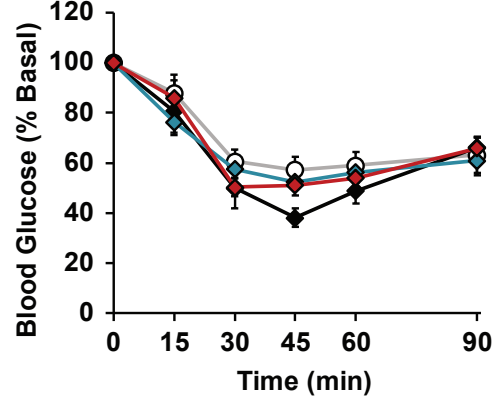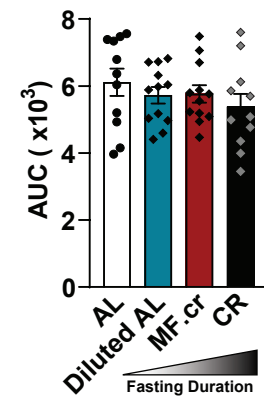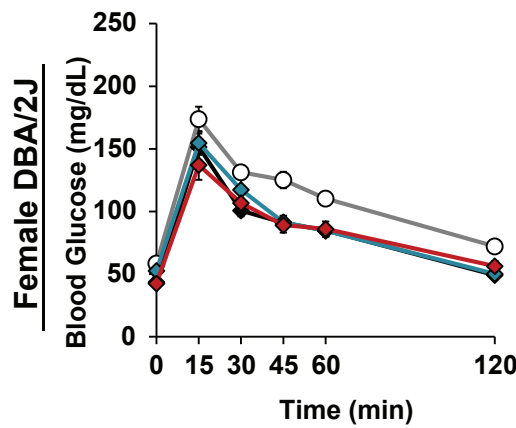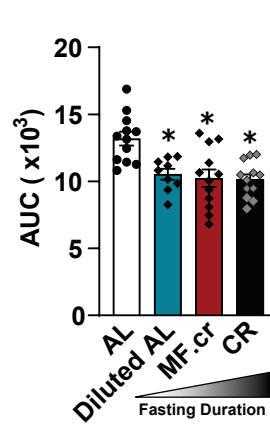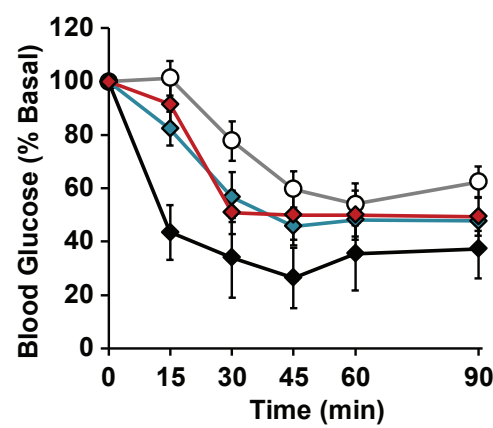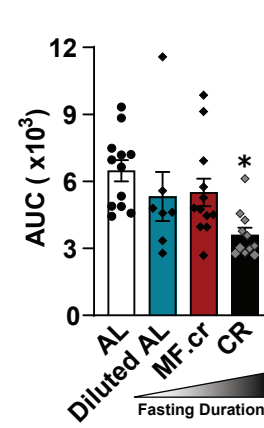

**Supplementary Figure 2. Additional measures of glucose homeostasis in female C57BL/6J mice and DBA/2J male and female mice.** (A) Glucose tolerance test performed on female C57BL/6J (AL, n = 12; Diluted AL, n = 12; MF.cr, n = 12; CR, n = 12 biologically independent mice), male DBA/2J (AL, n = 11; Diluted AL, n = 12; MF.cr, n = 12; CR, n = 11 biologically independent mice), and female DBA/2J (AL, n = 12; Diluted AL, n = 9; MF.cr, n = 12; CR, n = 12 biologically independent mice) mice of both sexes after 13 weeks on the indicated diets. (B) Insulin tolerance test performed on female C57BL/6J (AL, n = 12; Diluted AL, n = 12; MF.cr, n = 10; CR, n = 11 biologically independent mice), male DBA/2J (AL, n = 11; Diluted AL, n = 12; MF.cr, n = 12; CR, n = 11 biologically independent mice), and female DBA/2J (AL, n = 12; Diluted AL, n = 7; MF.cr, n = 12; CR, n = 11 biologically independent mice) mice of both sexes after 14 weeks on the indicated diets. Female C57BL/6J mice were given 0.5U insulin per kg of body weight; DBA/2J male and female mice were given 0.75U insulin per kg of body weight. \* symbol represents a significant difference versus AL (Diluted AL,  $p \leq 0.0064$ ; MF.cr,  $p \leq 0.0145$ ; CR,  $p \leq 0.0012$ ); # symbol represents a significant difference versus Diluted AL (MF.cr,  $p = 0.0378$ , CR,  $p \leq 0.0136$ ); @ symbol represents a significant difference versus MF.cr (AL,  $p = 0.0058$ ; CR,  $p \leq 0.0029$ ) based on Tukey's test post one-way ANOVA. All data are represented as mean  $\pm$  SEM.

# Supplementary Figure 3

## A

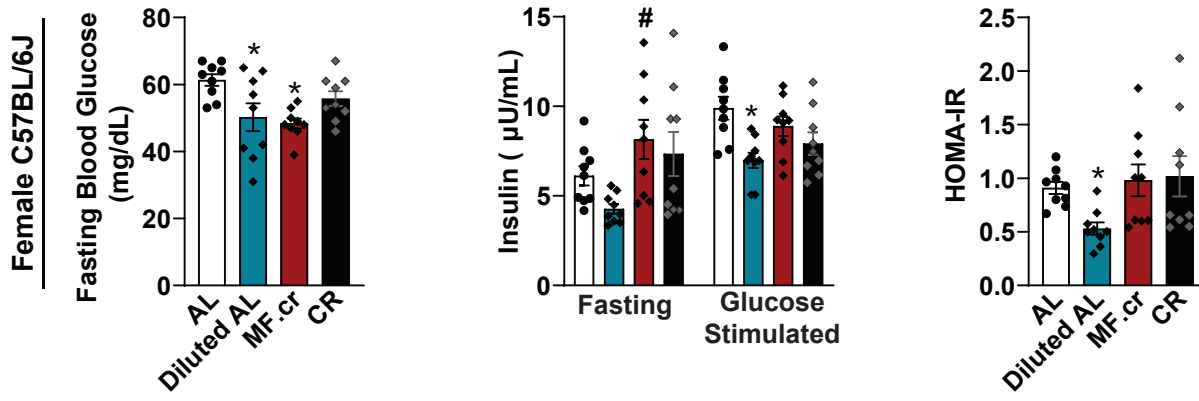

## B

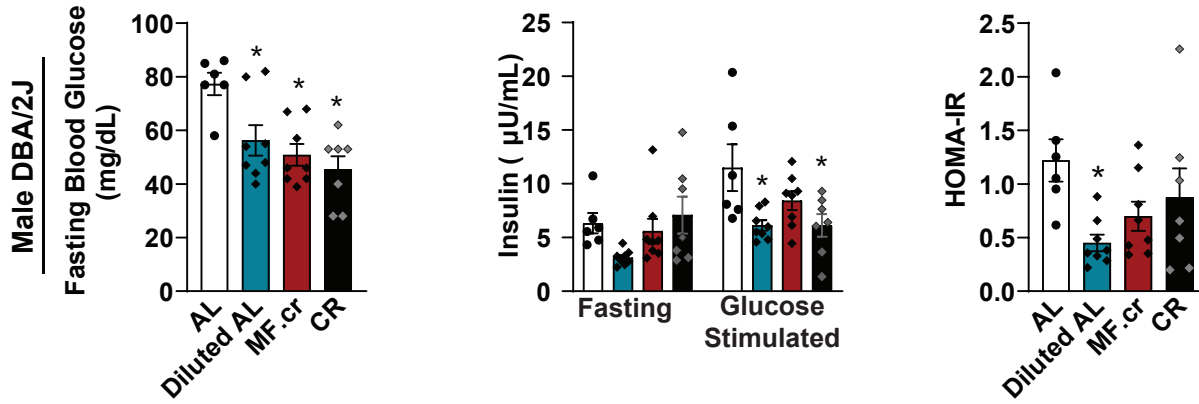

## C

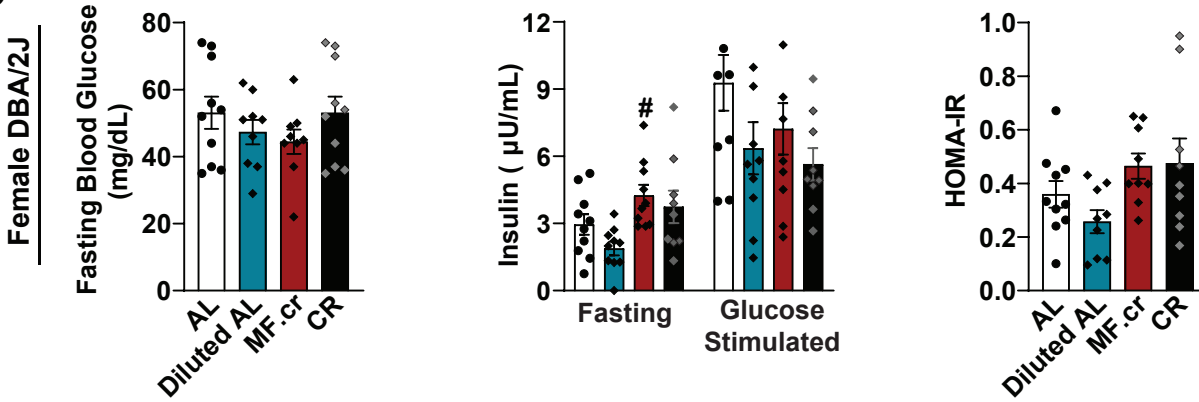

**Supplementary Figure 3. Additional measures of glucose and insulin in female C57BL/6J mice and DBA/2J male and female mice.** Mice were fasted overnight and blood glucose, fasting insulin, glucose stimulated insulin secretion (after 15 minutes) were determined, and the HOMA-IR was calculated after 11 weeks on the specified diets for (A) female C57BL/6J, (B) male DBA/2J, and (C) female DBA/2J mice (AL, n = 10; Diluted AL, n = 9; MF.cr, n = 9; CR, n = 9 biologically independent mice). \* symbol represents a significant difference versus AL (Diluted AL,  $p \leq 0.0314$ ; MFcr,  $p \leq 0.0053$ ; CR,  $p \leq 0.0240$ ); # symbol represents a significant difference versus Diluted AL (MF.cr,  $p \leq 0.0187$ ; CR,  $p = 0.0478$ ) based on Tukey's test post one-way ANOVA. All data are represented as mean  $\pm$  SEM.

# Supplementary Figure 4

CR and MF.cr Feeding

Timepoint

**A**

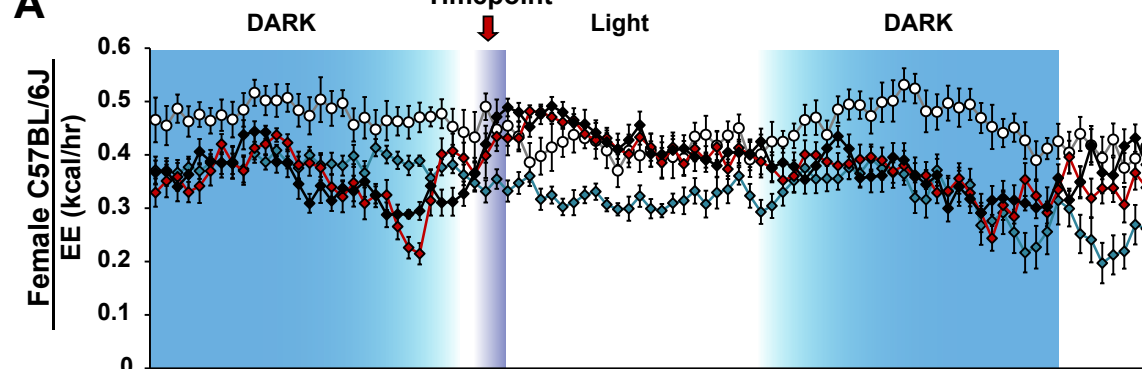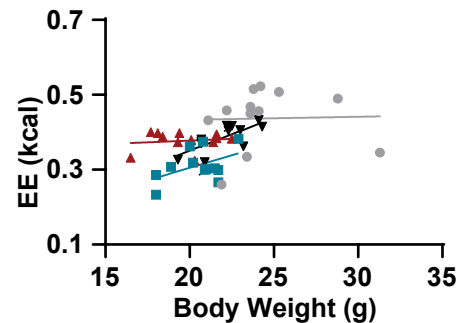

**B**

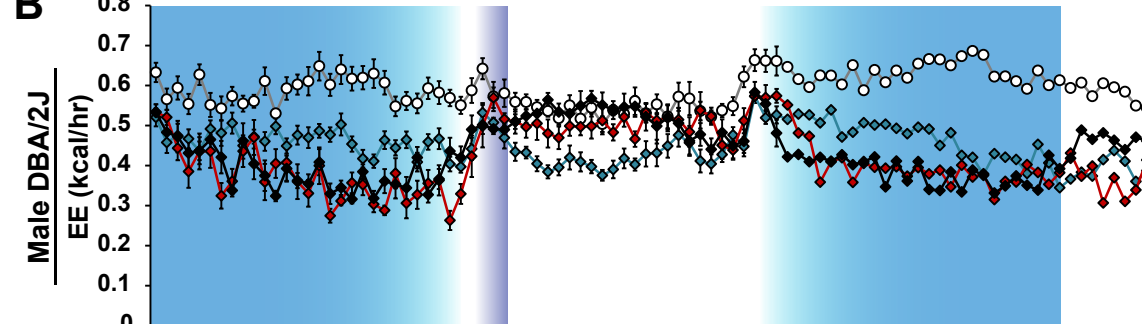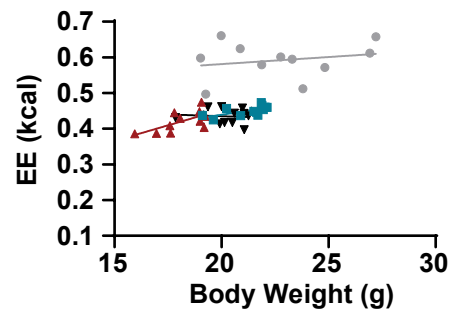

**C**

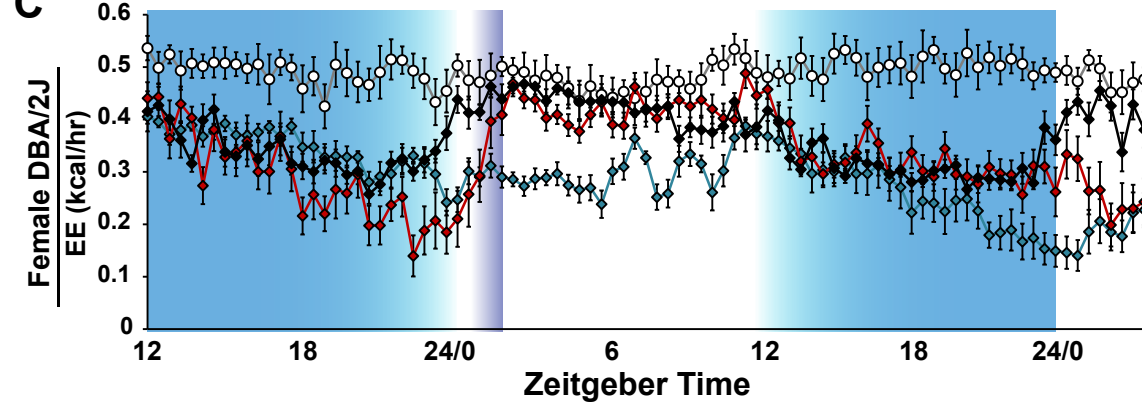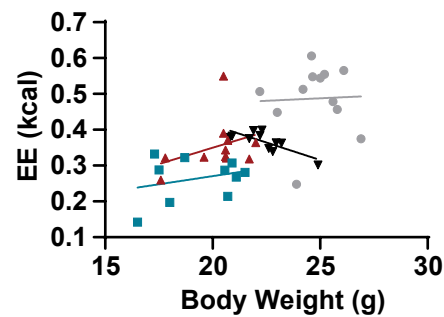

**D**

Female C57BL/6J

| Diet Comparison |            | Slope   |              | Elevation          |              |
|-----------------|------------|---------|--------------|--------------------|--------------|
|                 |            | p-Value | Significance | p-Value            | Significance |
| AL              | Diluted AL | 0.4097  | No           | 0.0060             | Yes          |
| AL              | MF.cr      | 0.9333  | No           | 0.1428             | No           |
| AL              | CR         | 0.2478  | No           | 0.1889             | No           |
| Diluted AL      | CR         | 0.6721  | No           | 0.0033             | Yes          |
| Diluted AL      | MF.cr      | 0.2000  | No           | <0.0001            | Yes          |
| CR              | MF.cr      | 0.0267  | Yes          | Cannot be compared |              |

**E**

Male DBA/2J

| Diet Comparison |            | Slope   |              | Elevation |              |
|-----------------|------------|---------|--------------|-----------|--------------|
|                 |            | p-Value | Significance | p-Value   | Significance |
| AL              | Diluted AL | 0.6826  | No           | <0.0001   | Yes          |
| AL              | MF.cr      | 0.3090  | No           | <0.0001   | Yes          |
| AL              | CR         | 0.6716  | No           | <0.0001   | Yes          |
| Diluted AL      | CR         | 0.171   | No           | 0.1783    | No           |
| Diluted AL      | MF.cr      | 0.2663  | No           | 0.4334    | No           |
| CR              | MF.cr      | 0.0665  | No           | 0.7964    | No           |

**F**

Female DBA/2J

| Diet Comparison |            | Slope   |              | Elevation |              |
|-----------------|------------|---------|--------------|-----------|--------------|
|                 |            | p-Value | Significance | p-Value   | Significance |
| AL              | Diluted AL | 0.8032  | No           | 0.0219    | Yes          |
| AL              | MF.cr      | 0.4223  | No           | 0.0062    | Yes          |
| AL              | CR         | 0.5978  | No           | 0.2633    | No           |
| Diluted AL      | CR         | 0.0687  | No           | 0.0042    | Yes          |
| Diluted AL      | MF.cr      | 0.6474  | No           | 0.0190    | Yes          |
| CR              | MF.cr      | 0.0634  | No           | 0.8511    | No           |



**Supplementary Figure 4. Additional energy expenditure data for C57BL/6J female and DBA/2J male and female mice.** A-C) Energy expenditure vs. time and energy expenditure as a function of total body mass was calculated for the 24-hour period following the indicated (arrow) refeeding time for A) C57BL/6J female mice (n = 12 biologically independent mice per diet) (B) DBA/2J male (AL, n = 12; Diluted AL, n = 11; MF.cr, n = 11; CR, n = 11 biologically independent mice) C) DBA/2J female (AL, n = 11; Diluted AL, n = 11; MF.cr, n = 11; CR, n = 10 biologically independent mice). Data for each individual mouse is plotted; slopes and intercepts were calculated using ANCOVA. Data are represented as mean  $\pm$  SEM.

# Supplementary Figure 5

**A**

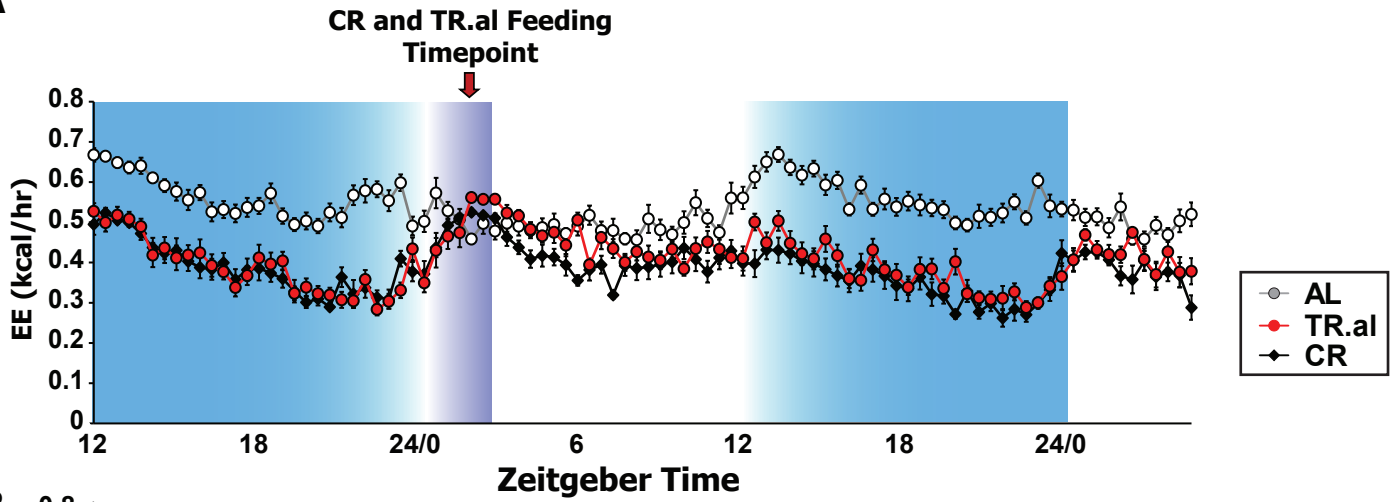

**B**

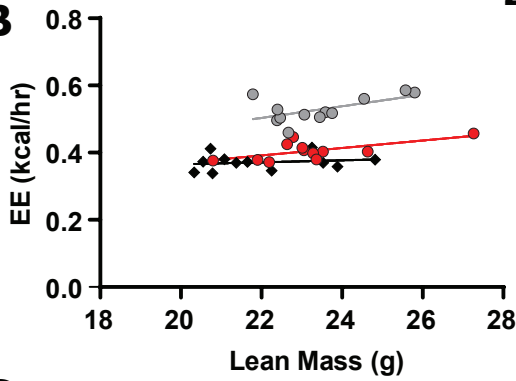

| Diet Comparison |       | Slope   |              | Elevation |              |
|-----------------|-------|---------|--------------|-----------|--------------|
|                 |       | p-Value | Significance | p-Value   | Significance |
| AL              | CR    | 0.1270  | No           | <0.0001   | Yes          |
| AL              | TR.cr | 0.4677  | No           | <0.0001   | Yes          |
| CR              | TR.cr | 0.2255  | No           | 0.0256    | Yes          |

**C**

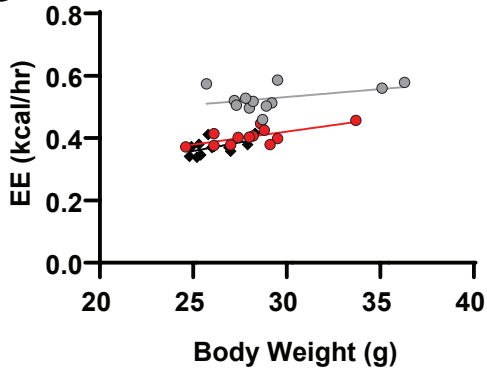

| Diet Comparison |       | Slope   |              | Elevation |              |
|-----------------|-------|---------|--------------|-----------|--------------|
|                 |       | p-Value | Significance | p-Value   | Significance |
| AL              | CR    | 0.5051  | No           | <0.0001   | Yes          |
| AL              | TR.cr | 0.4760  | No           | <0.0001   | Yes          |
| CR              | TR.cr | 0.6577  | No           | 0.1079    | No           |

**Supplementary Figure 5. Additional energy expenditure data for C57BL/6J male mice fed CR or TR.al diets.** A) Energy expenditure vs. time B) Energy expenditure as a function of lean mass was calculated for the 24-hour period following the indicated refeeding time C) Energy expenditure as a function of total body mass was calculated for the 24-hour period following the indicated (arrow) refeeding time (n = 12 biologically independent mice per diet, data for each individual mouse is plotted; slopes and intercepts were calculated using ANCOVA). Data are represented as mean  $\pm$  SEM.

# Supplementary Figure 6

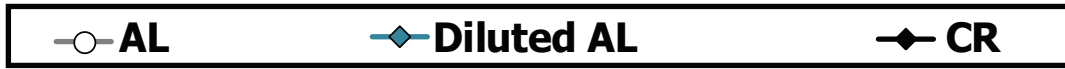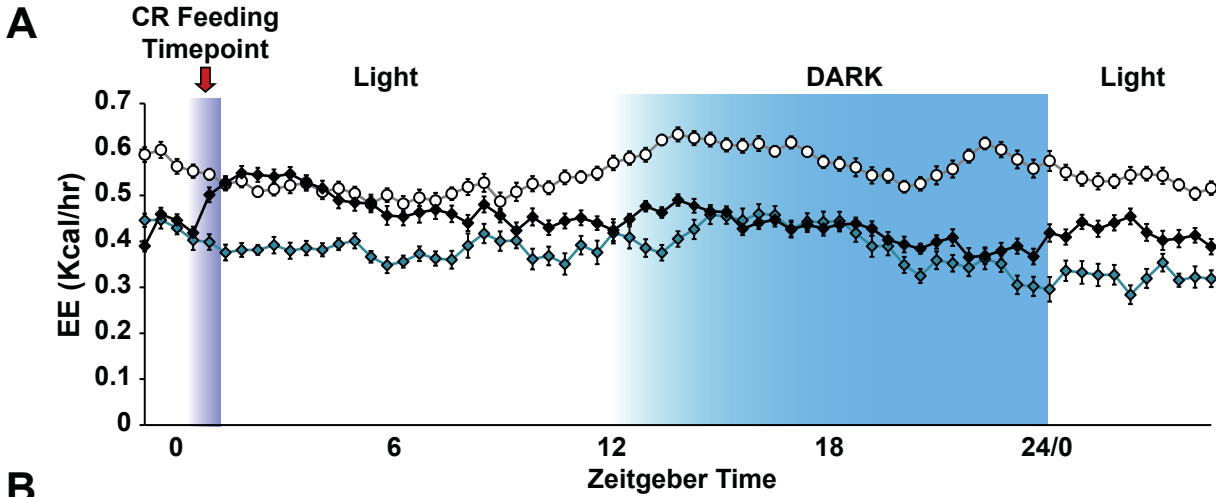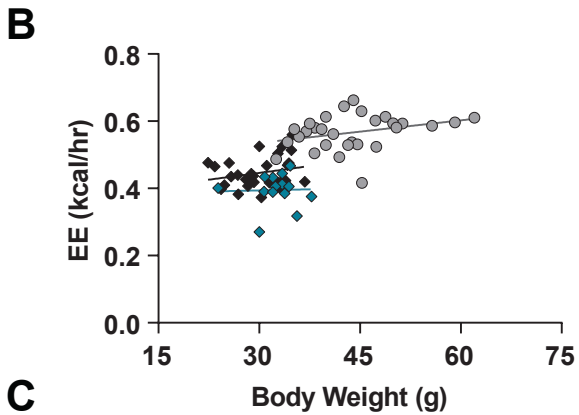

| Diet Comparison |            | Slope   |              | Elevation |              |
|-----------------|------------|---------|--------------|-----------|--------------|
|                 |            | p-Value | Significance | p-Value   | Significance |
| AL              | Diluted AL | 0.6959  | No           | <0.0001   | Yes          |
| AL              | CR         | 0.8613  | No           | <0.0001   | Yes          |
| CR              | Diluted AL | 0.6313  | No           | 0.0011    | Yes          |

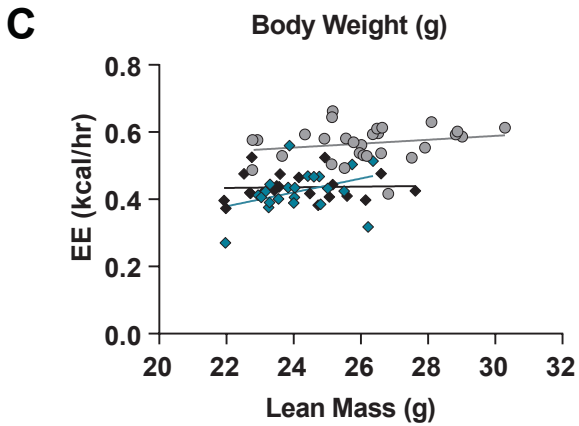

| Diet Comparison |            | Slope   |              | Elevation |              |
|-----------------|------------|---------|--------------|-----------|--------------|
|                 |            | p-Value | Significance | p-Value   | Significance |
| AL              | Diluted AL | 0.2238  | No           | <0.0001   | Yes          |
| AL              | CR         | 0.5741  | No           | <0.0001   | Yes          |
| CR              | Diluted AL | 0.1229  | No           | 0.4463    | No           |

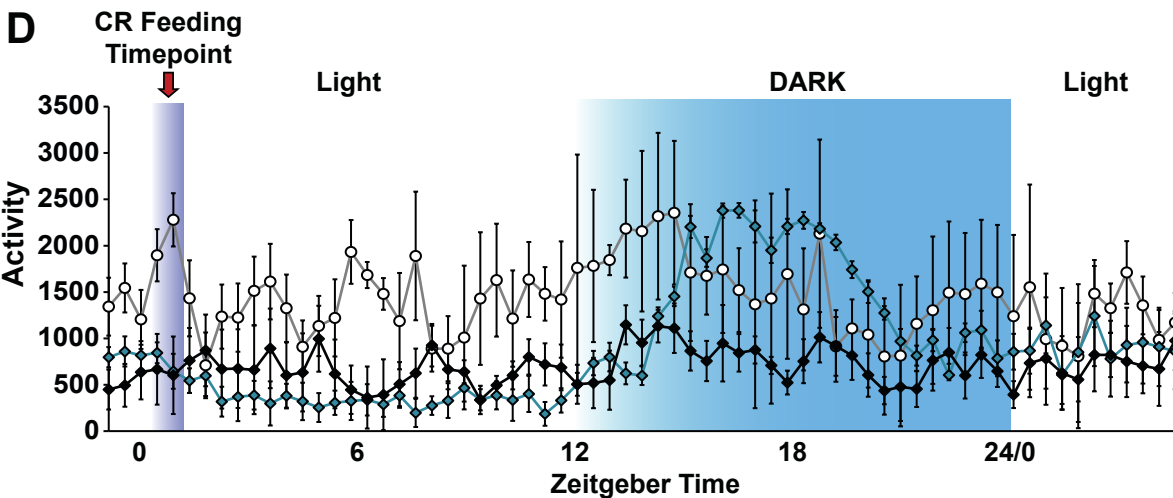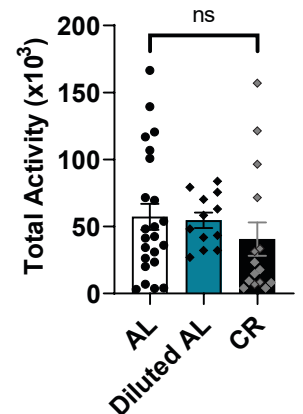

**Supplementary Figure 6. Additional energy expenditure data for 19-month-old C57BL/6J male.** A) Energy expenditure vs. time B) Energy expenditure as a function of total body mass was calculated for the 24 hour period following the indicated refeeding time C) Energy expenditure as a function of lean mass was calculated for the 24 hour period following the indicated refeeding time (D) Ambulatory activity vs. time and average sum of ambulatory activity was calculated for the 24 hour period following the indicated refeeding time (AL, n = 29; Diluted AL, n = 14; CR, n = 29 biologically independent mice). Data for each individual mouse is plotted; slopes and intercepts were calculated using ANCOVA). Data are represented as mean  $\pm$  SEM.
